# Supplementary material
Source: publisher site journal article supplement (https://www.dovepress.com/article/306532)
Supplement: Supplementary file 1 [file get_supplementary_file.php]

**Supplementary Table 1a** Comorbidity Criteria

| **Comorbidity** | **ICD-10 codes** | **Laboratory criteria** |
| --- | --- | --- |
| Anemia |  | Anemia (<13 for men, <12 for non-pregnant women)  <https://www.who.int/vmnis/indicators/haemoglobin.pdf> |
| Diabetes1 | E10-E14 | HgBa1c >=6.5 |
| Coronary artery disease 2 | I20-I25 |  |
| Hyperlipidemia3 | E78 |  |
| Hypertension1 | I10-I13, I15 |  |
| Osteoporosis/osteopenia4 | M-80 or M81 |  |
| Osteoarthritis4 | M15-M19 |  |
| Peripheral vascular disease5 | I70.x, I71.x, I73.1, I73.8, I73.9, I77.1, I79.0, I79.2, K55.1, K55.8, K55.9, Z95.8, Z95.9 |  |
| kidney disease5 | I12.0, I13.1, N03.2-N03.7, N05.2-N05.7, N18.x, N19.x, N25.0, Z49.0-Z49.2, Z94.0, Z99.2 | eGFR <60 |
| Cerebrovascular disease, including stroke and TIA3 | G45.x, G46.x, H34.0, I60.x-I69.x |  |
| Chronic diarrhea4 | K58.0, K59.1, R19.7 |  |
| Chronic constipation4 | K59.0 |  |
| Osteoporotic fracture4 | M80 |  |
| Lipohypertrophy4 | E88.1 (lipodystrophy) |  |
| Lipoatrophy4 | E88.1 (lipodystrophy) |  |
| Hearing loss4 | H90, H91 |  |
| COPD/emphysema4 | J40-J44 |  |
| Macular degeneration4 | H35.30-H35.32 |  |
| Eye disorders other than macular degeneration4 | H15-H18; H20-22; H25-28; H30-H35.2; H35.33-H36; H40-H42-H46 |  |
| Urinary incontinence4 | N39.3, N39.4 |  |
| Benign prostatic hyperplasia with lower urinary tract symptoms4 | N40.1 |  |
| Gait disorder4 | R26 |  |
| Peripheral neuropathy4 | E08.40-E08.42; E09.40-E09.42; E10.40-E10.42; E11.40-E11.42; E13.40-E13.42; G62-G64 |  |
| Anxiety disorder4 | F40 (phobias), F41 |  |
| Depression5 | F20.4, F31.3-F31.5, F32.x, F33.x, F34.1, F41.2, F43.2 |  |
| Lung cancer3 | C34 |  |
| Colon cancer3 | C18, C19 |  |
| Bladder cancer4 | C23 |  |
| Breast cancer3 | C50 |  |
| Lymphoma5 | C81.x-C85.x, C88.x, C96.x, C90.0, C90.2 |  |
| Anal cancer4 | C21 |  |
| Kaposi's sarcoma4 (ever) | B10.89 |  |

These were the diagnostic criteria used to determine presence of specific comorbidities. Mean number of comorbidities are listed in Table 1; presence of multimorbidity is in Table 2 of the main paper.

1. Tonelli M, Wiebe N, Fortin M, et al. Methods for identifying 30 chronic conditions: application to administrative data. *BMC Medical Informatics and Decision Making*. 2015;15:31. doi:10.1186/s12911-015-0155-5

2. Crump C, Sundquist K, Winkleby MA, Sundquist J. Comorbidities and mortality in bipolar disorder: A swedish national cohort study. *JAMA Psychiatry*. 2013;70(9):931-939. doi:10.1001/jamapsychiatry.2013.1394

3. Henderson T, Shepheard J, Sundararajan V. Quality of diagnosis and procedure coding in ICD-10 administrative data. *Med Care*. 2006;44(11):1011-1019. doi:10.1097/01.mlr.0000228018.48783.34

4. Centers for Medicare and Medicaid Services. 2018 ICD-10 CM and GEMs | CMS. Published 2018. Accessed January 10, 2020. https://www.cms.gov/Medicare/Coding/ICD10/2018-ICD-10-CM-and-GEMs

5. Quan H, Sundararajan V, Halfon P, et al. Coding algorithms for defining comorbidities in ICD-9-CM and ICD-10 administrative data. *Med Care*. 2005;43(11):1130-1139.

**Supplementary Table 1b**

Comorbidity Group Classification

| **Comorbidity** | **High risk** | **Functional** |
| --- | --- | --- |
| Diabetes | * |  |
| Coronary artery disease | * |  |
| Hyperlipidemia | * |  |
| Hypertension | * |  |
| Osteoporosis/osteopenia |  | * |
| Osteoporotic fracture |  | * |
| Osteoarthritis |  | * |
| Kidney disease | * |  |
| Anemia | * |  |
| Cerebrovascular disease | * | * |
| Chronic diarrhea |  | * |
| Chronic constipation |  | * |
| Lipohypertrophy/lipoatrophy | * | * |
| Obesity ([Body Mass Index >= 30]) | * | * |
| Hearing loss |  | * |
| Chronic obstructive pulmonary disease (COPD) /emphysema | * |  |
| Macular degeneration |  | * |
| Eye disorders |  | * |
| Urinary incontinence |  | * |
| Benign prostatic hyperplasia |  | * |
| Gait disorder |  | * |
| Peripheral neuropathy |  | * |
| Anxiety disorder |  | * |
| Depression |  | * |
| Lung cancer | * |  |
| Colon cancer | * |  |
| Bladder cancer | * |  |
| Breast cancer | * |  |
| Anal cancer | * |  |
| Kaposi’s Sarcoma | * |  |
| Lymphoma | * |  |

This table provides the classification of individual comorbidities into functional and/or high risk categories. The mean prevalence of total, as well as subclassifications, is presented in Table 1 of the main paper.

**Supplementary Table 2a**

Results of logistic regression predicting referral status.

| Variable | Wald Χ2 | p | OR |
| --- | --- | --- | --- |
| Age | 37.18 | 0.00 | 1.14 |
| Years with Diagnosis | 0.36 | 0.55 | 0.99 |
| Smoker | 0.07 | 0.79 | 1.11 |
| Former Smoker | 0.27 | 0.60 | 0.84 |
| Cisgendered Female | 0.00 | 0.95 | 1.03 |
| Trans FTM | 0.00 | 1.00 | 0.00 |
| Trans MTF | 0.07 | 0.79 | 1.36 |
| MSM | 0.01 | 0.93 | 1.04 |
| IDU | 1.30 | 0.25 | 0.57 |
| Hemophilia | 0.00 | 1.00 | 0.00 |
| Hetero Sexual Sex | 1.75 | 0.19 | 0.52 |
| Race: Other | 0.35 | 0.56 | 0.75 |
| Race: Hispanic | 0.49 | 0.48 | 0.75 |
| Race: African American | 0.77 | 0.38 | 1.44 |
| Race: Asian | 0.00 | 1.00 | 0.00 |
| Kidney Disease | 0.08 | 0.77 | 1.10 |
| Hypertension | 0.21 | 0.64 | 1.15 |
| Cerebrovascular Disease | 4.50 | 0.03 | 2.21 |
| COPD or Emphysema | 1.26 | 0.26 | 1.55 |
| Coronary Artery Disease | 0.52 | 0.47 | 1.32 |
| Hyperlipidemia | 0.64 | 0.42 | 1.28 |
| Osteoporosis | 1.11 | 0.29 | 1.54 |
| Osteoarthritis | 0.00 | 0.95 | 1.02 |
| Peripheral Vascular Disease | 1.94 | 0.16 | 0.38 |
| Hepatitis C | 2.41 | 0.12 | 1.74 |
| Chronic Diarrhea | 1.47 | 0.23 | 0.42 |
| Chronic Constipation | 0.14 | 0.71 | 1.23 |
| Osteoporotic Fracture | 0.00 | 1.00 | 0.00 |
| Lipohypertrophy | 0.56 | 0.46 | 0.66 |
| Hearing Loss | 0.03 | 0.86 | 1.08 |
| Macular Degeneration | 0.07 | 0.79 | 1.36 |
| Eye Disorders | 2.00 | 0.16 | 1.50 |
| Urinary Incontinence | 7.79 | 0.01 | 4.83 |
| BPH with LUTS | 0.49 | 0.48 | 1.28 |
| Gait Disorder | 8.47 | 0.00 | 3.65 |
| Peripheral Neuropathy | 6.15 | 0.01 | 2.16 |
| Anxiety Disorder | 7.27 | 0.01 | 2.34 |
| Depression | 2.72 | 0.10 | 1.61 |
| Lung Cancer | 0.00 | 0.97 | 0.96 |
| Colon Cancer | 0.00 | 1.00 | 0.00 |
| Bladder Cancer | 0.18 | 0.67 | 0.38 |
| Breast Cancer | 0.00 | 1.00 | 0.00 |
| Lymphoma | 0.04 | 0.84 | 1.15 |
| Anal Cancer | 0.03 | 0.85 | 1.23 |
| Kaposi Sarcoma | 2.69 | 0.10 | 3.00 |

Notes.OR=odds ratio, IDU=intravenous drug use, MSM=Men who have

sex with men.

**Supplementary Table 2b**

Results of multiple regression predicting higher PHQ-2 depression score.

| Variable | Beta | *t* | *p* | *f*2 | *r*2 |
| --- | --- | --- | --- | --- | --- |
| Step 1 |  |  |  |  | 0.13 |
| Latino | 0.10 | 0.79 | 0.43 | 0.01 |  |
| African-American | -0.02 | -0.13 | 0.90 | <.01 |  |
| Female | 0.05 | 0.30 | 0.77 | <.01 |  |
| MSM | 0.08 | 0.32 | 0.75 | <.01 |  |
| Heterosexual Sex | -0.05 | -0.20 | 0.84 | <.01 |  |
| IDU | 0.01 | 0.05 | 0.96 | <.01 |  |
| Age | -0.08 | -0.76 | 0.45 | 0.01 |  |
| Years with HIV | 0.16 | 1.33 | 0.19 | 0.02 |  |
| ADL | -0.09 | -0.67 | 0.50 | 0.01 |  |
| IADL | 0.09 | 0.54 | 0.59 | <.01 |  |
| Comorbidities | 0.22 | 1.75 | 0.08 | 0.04 |  |
| *Step 2* |  |  |  |  | *0.40* |
| Latino | .04 | 0.29 | 0.77 | <.01 |  |
| African-American | -.08 | -0.56 | 0.58 | <.01 |  |
| Female | -.10 | -0.63 | 0.53 | .01 |  |
| MSM | -.01 | -0.06 | 0.95 | <.01 |  |
| Heterosexual Sex | -.11 | -0.51 | 0.61 | <.01 |  |
| IDU | -.05 | -0.33 | 0.75 | <.01 |  |
| Age | -.08 | -0.75 | 0.46 | 0.01 |  |
| Years with HIV | .11 | 1.01 | 0.32 | 0.01 |  |
| ADL | -.01 | -0.10 | 0.92 | <.01 |  |
| IADL | .01 | 0.09 | 0.93 | <.01 |  |
| Comorbidities | .03 | 0.27 | 0.79 | <.01 |  |
| # of Goals | -.19 | -1.71 | 0.09 | 0.04 |  |
| Living Codes | .00 | -0.03 | .98 | <.01 |  |
| *Weight Loss Codes* | .24 | 2.10 | 0.04 | *0.06* |  |
| *Fatigue Codes* | .30 | 2.45 | 0.02 | *0.08* |  |
| Mobility Codes | -.07 | -0.54 | .59 | <.01 |  |
| Memory Codes | .06 | 0.54 | .59 | <.01 |  |
| Gait Codes | -.10 | -0.73 | .47 | 0.01 |  |
| Frail Codes | .09 | 0.85 | .40 | 0.01 |  |
| Pain Codes | .16 | 1.34 | .18 | 0.03 |  |

Notes.Rows in italic represent statistically significant parameters. IDU=intravenous drug use,

ADL=activities of daily living, IADL=instrumental activities of daily living. MSM=Men who

have sex with men, *f*2=Cohen’s *f*2, a measure of effect size

**Supplementary Table 2c**

Results of multiple regression predicting VACS index.

| Variable | Beta | *t* | *p* | *f*2 | *r*2 |
| --- | --- | --- | --- | --- | --- |
| Step 1 |  |  |  |  | 0.13 |
| Latino | -0.14 | -1.14 | 0.26 | <.01 |  |
| African-American | -0.12 | -0.96 | 0.34 | <.01 |  |
| MSM | -0.39 | -1.64 | 0.10 | 0.06 |  |
| Heterosexual Sex | -0.08 | -0.38 | 0.70 | 0.02 |  |
| IDU | 0.01 | 0.07 | 0.95 | 0.04 |  |
| Years with HIV | 0.07 | 0.64 | 0.52 | <.01 |  |
| Step 2 |  |  |  |  | 0.5 |
| Latino | -0.14 | -1.39 | 0.17 | <.01 |  |
| African-American | -0.14 | -1.30 | 0.20 | <.01 |  |
| MSM | -0.01 | -0.05 | 0.96 | 0.08 |  |
| Heterosexual Sex | 0.10 | 0.56 | 0.58 | 0.03 |  |
| IDU | 0.20 | 1.56 | 0.12 | 0.05 |  |
| Years with HIV | -0.01 | -0.07 | 0.94 | <.01 |  |
| # of Goals | -0.06 | -0.75 | 0.45 | 0.02 |  |
| Living Codes | 0.18 | 2.26 | 0.03 | 0.04 |  |
| Weight Loss Codes | 0.29 | 3.20 | <.01 | 0.36 |  |
| Fatigue Codes | -0.05 | -0.57 | 0.57 | 0.05 |  |
| Mobility Codes | 0.06 | 0.56 | 0.57 | 0.13 |  |
| Memory Codes | -0.04 | -0.42 | 0.67 | <.01 |  |
| Gait Codes | 0.39 | 3.97 | <.01 | 0.43 |  |
| Frail Codes | 0.16 | 1.86 | 0.07 | 0.11 |  |

Notes*.* Rows in italic represent statistically significant parameters. IDU=intravenous drug use,

ADL=activities of daily living, IADL=instrumental activities of daily living. MSM=Men who

have sex with men, *f*2=Cohen’s *f*2: a measure of effect size
